# Supplementary material for: Magnetic nano-adsorbent integrated with lab-on-valve system for trace analysis of multiple heavy metals
Source: Royal Society of Chemistry journal article supplement (doi:10.1039/b814164a), 2009-01-01
Supplement: b814164a.pdf [file b814164a.pdf]

# Magnetic Nano-adsorbent integrated with Flow-injection System for Trace Analysis of Multiple Heavy Metals

Pei-Ling Lee,<sup>a</sup> Yuh-Chang Sun<sup>a</sup> and Yong-Chien Ling<sup>\*b</sup>Department of Biomedical Engineering and Environmental Sciences,<sup>a</sup> Department of Chemistry<sup>\*b</sup>, National Tsing Hua University, Hsinchu 30013, Taiwan

## Electronic Supplementary Information

### Power X-ray Diffraction Measurement

Fig. S-1 shows the powder X-ray diffraction (PXRD) patterns of the pristine MNPs and MNPs-PAA, respectively. The PXRD characteristic peaks ( $2\theta = 30.26, 35.45, 43.3, 53.5, 57.12, 62.65^\circ$ ) for iron oxide ( $\text{Fe}_3\text{O}_4$  or  $\gamma\text{-Fe}_2\text{O}_3$ ), which were marked with respective indices (220), (311), (400), (422), (511), (440), appeared in both samples. The average crystallite size revealed from peak broadening was about 8 nm (and 4 nm) for pristine MNPs (and MNPs-PAA) according to Scherrer equation.<sup>1</sup>

$$D = \frac{0.9 \lambda}{\beta \cos \theta}$$

where  $D$  is the average crystallite size (nm),  $\lambda$  is the wavelength of X-rays ( $\text{CuK}\alpha : \lambda = 0.1540 \text{ nm}$ ),  $\theta$  is the Bragg diffraction angle, and  $\beta$  is the full width at half maximum (FWHM in radians).

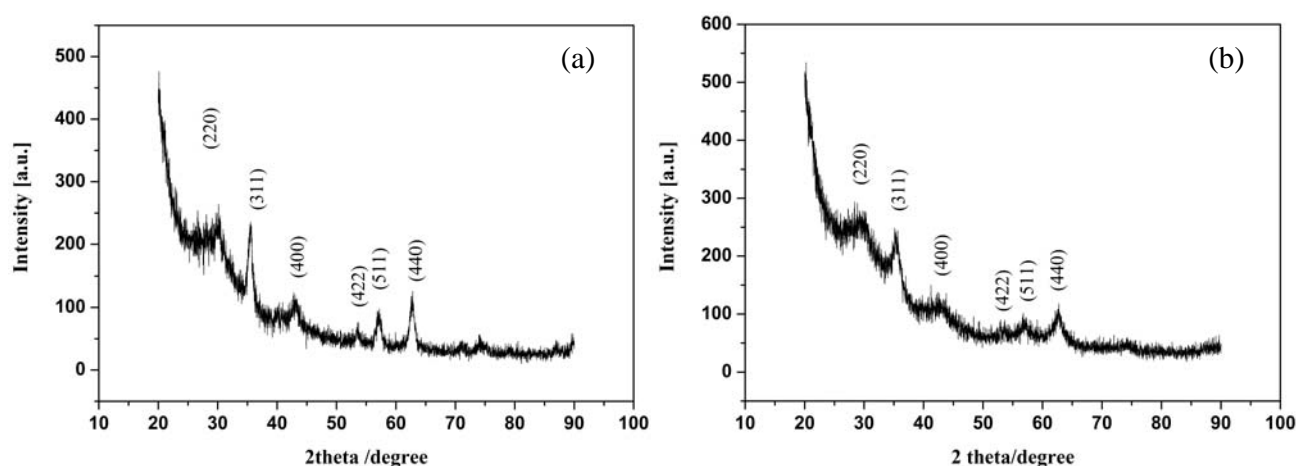

**Fig. S-1** The powder X-ray diffraction (PXRD) patterns of (a) pristine MNPs, and (b) MNPs-PAA. The peaks are indexed to JCPDS card No. 19-0629.

**Estimation of Total Surface Area Per Unit Volume (Table S-1)**

1. The number of MNPs-PAA in one  $\text{cm}^3$  is  $8 \times 10^8$  particles (5-nm particle size; non-porous material). The surface area of one MNPs-PAA is  $78.5 \text{ nm}^2$ . The total surface area per unit volume is  $6.3 \times 10^{20} \text{ nm}^2 \text{ cm}^{-3}$ .
2. The number of Amberlite XAD-4 in one  $\text{cm}^3$  is 4096 particles (640- $\mu\text{m}$  particle size; porous material 10-nm pore size; assuming 100 % porosity). The surface area of one XAD-4 is  $5.14 \times 10^{12} \text{ nm}^2$ , which is based on  $\sim 1.63 \times 10^{10}$  pores present in one XAD-4 (surface area of one 10-nm pore is  $314 \text{ nm}^2$ ). The total surface area per unit volume is  $2.1 \times 10^{16} \text{ nm}^2 \text{ cm}^{-3}$ .
3. The number of  $\text{C}_{18}$  in one  $\text{cm}^3$  is  $9 \times 10^9$  particles (4.81- $\mu\text{m}$  particle size; porous material 8-nm pore size; assuming 100 % porosity). The surface area of one  $\text{C}_{18}$  is  $2.89 \times 10^8 \text{ nm}^2$ , which is based on  $\sim 1.44 \times 10^6$  pores present in one  $\text{C}_{18}$  (surface area of one 8-nm pore is  $200.96 \text{ nm}^2$ ). The total surface area per unit volume is  $2.6 \times 10^{18} \text{ nm}^2 \text{ cm}^{-3}$ .

**Table S-1.** Comparison of specific surface area and relevant properties in different adsorbents

| Adsorbent                    | Particle size (nm) | Specific surface area ( $\text{m}^2 \text{ g}^{-1}$ ) | Pore size (nm) | Total surface area per unit volume ( $\text{nm}^2 \text{ cm}^{-3}$ ) <sup>a</sup> |
|------------------------------|--------------------|-------------------------------------------------------|----------------|-----------------------------------------------------------------------------------|
| MNPs-PAA                     | 5-10               | 120                                                   | 2.7            | $6.3 \times 10^{20}$                                                              |
| Amberlite XAD-4 <sup>b</sup> | $6.4 \times 10^5$  | 831                                                   | 6~20           | $2.1 \times 10^{16}$                                                              |
| $\text{C}_{18}$ <sup>c</sup> | $4.8 \times 10^3$  | 187                                                   | 8              | $2.6 \times 10^{18}$                                                              |

<sup>a</sup> Calculations were based on non-porous MNPs-PAA and 100 % porosity in XAD-4 and  $\text{C}_{18}$ .

<sup>b</sup> The specific surface area and pore size data were from reference<sup>2</sup> and manufacturing company.

<sup>c</sup> The particle size, specific surface area, and pore size data were from reference.<sup>3</sup>

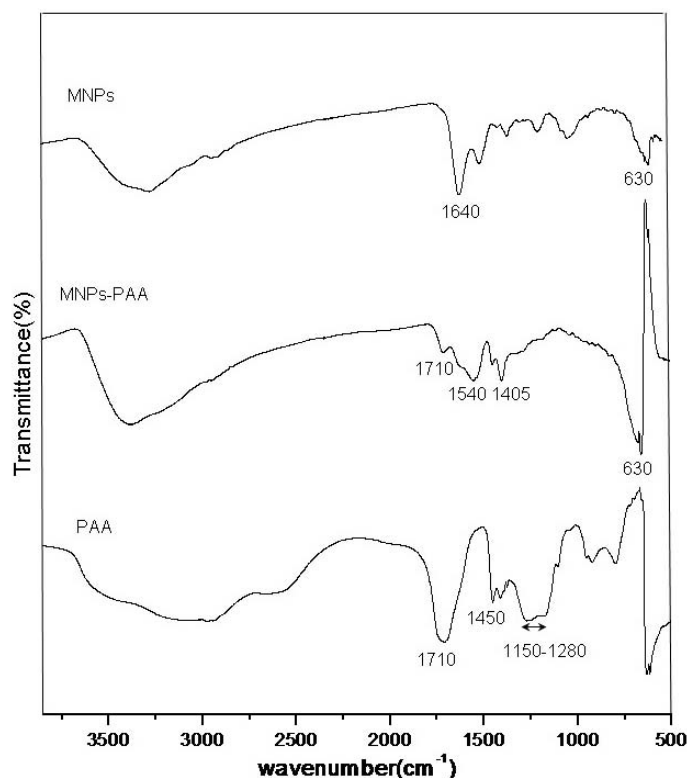

**Fig. S-2** The FT-IR spectra of pristine MNPs, MNPs-PAA, and PAA.

Comparing the FT-IR spectra of pristine MNPs, MNPs-PAA, and PAA shown in Fig. S-2, characteristic absorption band at 630 cm<sup>-1</sup> ascribed to Fe-O bond was expectedly present in both pristine MNPs and MNPs-PAA spectra. Similarly, characteristic bands at 3200 and 3400 cm<sup>-1</sup> ascribed to N-H stretching vibrations of amine and amide were present in pristine MNPs and MNPs-PAA spectra. The absorption bands at 1500 and 1640 cm<sup>-1</sup> characteristic of N-H bending vibration were present in the pristine MNPs spectrum only. Weak absorption bands at 1405, 1540, and 1710 cm<sup>-1</sup> were present in the MNPs-PAA spectrum. The 1710 cm<sup>-1</sup> band in PAA and MNPs-PAA spectra was ascribed to C=O from the carboxylic groups in PAA. On contrast, absorption bands at 1405 and 1540 cm<sup>-1</sup> present in MNPs-PAA spectrum only were presumably the outcome of acid-base binding between the PAA and the MNPs

to form carboxylate groups. Previous study ascribed 1405 and 1540 cm<sup>-1</sup> bands to COO<sup>-</sup> anti-symmetric and COO<sup>-</sup> symmetric vibrations, respectively.<sup>4,5</sup> Thus, the bidentate bonding of the carbonyl groups to the most outer Fe atoms of MNPs could be demonstrated. Other characteristic absorption bands of PAA such as 1150-1280 cm<sup>-1</sup> (aliphatic acid), 1400-1450 cm<sup>-1</sup> (C-O stretch, deformation vibration of OH)<sup>1</sup>

### TGA Measurements

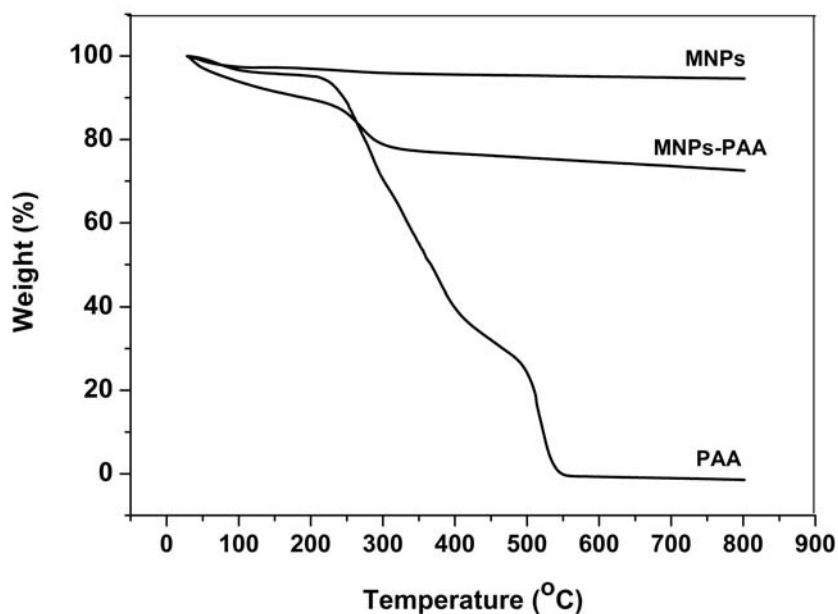

**Fig. S-3** The TGA curves of pristine MNPs, MNPs-PAA and PAA

Fig. S-3 shows the TGA curves of pristine MNPs, MNPs-PAA and PAA. For pristine MNPs, there are not significant weight loss. The PAA oligomer and MNPs-PAA simultaneously show the significant weight losses at two stages on contrast. The first stage of degradation is below 250 °C contributing to the decompositions of free carboxyl groups and dehydration. The second stage of degradation is 250 °C-800 °C attributing to the decompositions of polymer backbone.<sup>6</sup> The weight loss of MNPs-PAA due to dehydration is 2 % and 18 % for degradation of free carboxyl groups and polymer backbone. From the results of TGA analysis, 0.22 g PAA existing on 1 g MNPs would be presumed.

The estimated number of -COOH per unit area was  $9.02 \times 10^{11}$  molecules  $\text{cm}^{-2}$ , which was based on average particles size of 5 nm and 28 AA molecules per one PAA molecule.

### References

1. C. L. Lin, C. F. Lee and W. Y. Chiu, *J. Colloid Interf. Sci.*, 2005, **291**, 411-420.
2. K. L. Hubbard, J. A. Finch and G. D. Darling, *React. Funct. Polym.*, 1999, **40**, 61-90.
3. F. Gritti and G. Guiochon, *J. Chromatogr. A*, 2006, **1115**, 142-163.
4. R. G. C. Moore, S. D. Evans, T. Shen and C. E. C. Hodson, *Physica E*, 2001, **9**, 253-261.
5. N. Shukla, C. Liu, P. M. Jones and D. Weller, *J. Magn. Magn. Mater.*, 2003, **266**, 178-184.
6. H. Kong, C. Gao and D. Y. Yan, *J. Am. Chem. Soc.*, 2004, **126**, 412-413.
